# Supplementary material
Source: HighWire-hosted journal article supplement (https://bmjopen.bmj.com/content/11/2/e044012)
Supplement: inline-supplementary-material-1 [file inline-supplementary-material-1.pdf]

| Search Strategy: PubMed |                                                                                                                                                                                                                                                                                                                                                                                                                                                                                                                                                                                                                                                                                                                                                                                                                                                                                                                                                                                                                                                                                                                                                                                                                                                                                                                                                                                                                                                                                                                                                                                                                                                                                                                                                                                                                                                                                                                                                                                                                                                                                                                                                                                                                                                                                                                                                                                                                                                                                                                                                                                                                                                                                                                                                                                                                                                                                                                                                                                                                                                                                                                                                                                                                                                                                                                                                                                                                                                                                                                                                                                                                                                                                                                                                                                                                                                                                                                                                                                                                                                                                                                                                                                                                                                                                                                                                                                                                                                                                                                                                                                                            | Results | Key Words |
|-------------------------|------------------------------------------------------------------------------------------------------------------------------------------------------------------------------------------------------------------------------------------------------------------------------------------------------------------------------------------------------------------------------------------------------------------------------------------------------------------------------------------------------------------------------------------------------------------------------------------------------------------------------------------------------------------------------------------------------------------------------------------------------------------------------------------------------------------------------------------------------------------------------------------------------------------------------------------------------------------------------------------------------------------------------------------------------------------------------------------------------------------------------------------------------------------------------------------------------------------------------------------------------------------------------------------------------------------------------------------------------------------------------------------------------------------------------------------------------------------------------------------------------------------------------------------------------------------------------------------------------------------------------------------------------------------------------------------------------------------------------------------------------------------------------------------------------------------------------------------------------------------------------------------------------------------------------------------------------------------------------------------------------------------------------------------------------------------------------------------------------------------------------------------------------------------------------------------------------------------------------------------------------------------------------------------------------------------------------------------------------------------------------------------------------------------------------------------------------------------------------------------------------------------------------------------------------------------------------------------------------------------------------------------------------------------------------------------------------------------------------------------------------------------------------------------------------------------------------------------------------------------------------------------------------------------------------------------------------------------------------------------------------------------------------------------------------------------------------------------------------------------------------------------------------------------------------------------------------------------------------------------------------------------------------------------------------------------------------------------------------------------------------------------------------------------------------------------------------------------------------------------------------------------------------------------------------------------------------------------------------------------------------------------------------------------------------------------------------------------------------------------------------------------------------------------------------------------------------------------------------------------------------------------------------------------------------------------------------------------------------------------------------------------------------------------------------------------------------------------------------------------------------------------------------------------------------------------------------------------------------------------------------------------------------------------------------------------------------------------------------------------------------------------------------------------------------------------------------------------------------------------------------------------------------------------------------------------------------------------------------------|---------|-----------|
| 10                      | #9 NOT (telemedicine OR telehealth OR telepsychiatry)                                                                                                                                                                                                                                                                                                                                                                                                                                                                                                                                                                                                                                                                                                                                                                                                                                                                                                                                                                                                                                                                                                                                                                                                                                                                                                                                                                                                                                                                                                                                                                                                                                                                                                                                                                                                                                                                                                                                                                                                                                                                                                                                                                                                                                                                                                                                                                                                                                                                                                                                                                                                                                                                                                                                                                                                                                                                                                                                                                                                                                                                                                                                                                                                                                                                                                                                                                                                                                                                                                                                                                                                                                                                                                                                                                                                                                                                                                                                                                                                                                                                                                                                                                                                                                                                                                                                                                                                                                                                                                                                                      | 137     |           |
| 8                       | #8 NOT ((qualitative study [ti] OR qualitative studies [ti]) OR (((("Semi-structured" [TIAB] OR semistructured [TIAB] OR unstructured [TIAB] OR informal [TIAB] OR "in-depth" [TIAB] OR indepth [TIAB] OR "face-to-face" [TIAB] OR structured [TIAB] OR guide [TIAB] OR guides [TIAB]) AND (interview* [TIAB] OR discussion* [TIAB] OR questionnaire* [TIAB])) OR ("focus group" [TIAB] OR "focus groups" [TIAB] OR qualitative [TIAB] OR ethnograph* [TIAB] OR fieldwork [TIAB] OR "field work"[TIAB] OR "key informant" [TIAB])) OR "interviews as topic" [Mesh] OR "focus groups" [Mesh] OR narration [Mesh] OR qualitative research [Mesh] OR "personal narratives as topic"[Mesh]))                                                                                                                                                                                                                                                                                                                                                                                                                                                                                                                                                                                                                                                                                                                                                                                                                                                                                                                                                                                                                                                                                                                                                                                                                                                                                                                                                                                                                                                                                                                                                                                                                                                                                                                                                                                                                                                                                                                                                                                                                                                                                                                                                                                                                                                                                                                                                                                                                                                                                                                                                                                                                                                                                                                                                                                                                                                                                                                                                                                                                                                                                                                                                                                                                                                                                                                                                                                                                                                                                                                                                                                                                                                                                                                                                                                                                                                                                                                   | 141     |           |
| 8                       | #7 NOT ((case reports [pt] OR comment [pt] OR editorial [pt] OR letter [pt] OR news [pt]))                                                                                                                                                                                                                                                                                                                                                                                                                                                                                                                                                                                                                                                                                                                                                                                                                                                                                                                                                                                                                                                                                                                                                                                                                                                                                                                                                                                                                                                                                                                                                                                                                                                                                                                                                                                                                                                                                                                                                                                                                                                                                                                                                                                                                                                                                                                                                                                                                                                                                                                                                                                                                                                                                                                                                                                                                                                                                                                                                                                                                                                                                                                                                                                                                                                                                                                                                                                                                                                                                                                                                                                                                                                                                                                                                                                                                                                                                                                                                                                                                                                                                                                                                                                                                                                                                                                                                                                                                                                                                                                 | 230     |           |
| 7                       | #5 NOT (protocol [ti]) Filters: English, from 2000-2020                                                                                                                                                                                                                                                                                                                                                                                                                                                                                                                                                                                                                                                                                                                                                                                                                                                                                                                                                                                                                                                                                                                                                                                                                                                                                                                                                                                                                                                                                                                                                                                                                                                                                                                                                                                                                                                                                                                                                                                                                                                                                                                                                                                                                                                                                                                                                                                                                                                                                                                                                                                                                                                                                                                                                                                                                                                                                                                                                                                                                                                                                                                                                                                                                                                                                                                                                                                                                                                                                                                                                                                                                                                                                                                                                                                                                                                                                                                                                                                                                                                                                                                                                                                                                                                                                                                                                                                                                                                                                                                                                    | 239     |           |
| 6                       | #5 NOT (protocol [ti])                                                                                                                                                                                                                                                                                                                                                                                                                                                                                                                                                                                                                                                                                                                                                                                                                                                                                                                                                                                                                                                                                                                                                                                                                                                                                                                                                                                                                                                                                                                                                                                                                                                                                                                                                                                                                                                                                                                                                                                                                                                                                                                                                                                                                                                                                                                                                                                                                                                                                                                                                                                                                                                                                                                                                                                                                                                                                                                                                                                                                                                                                                                                                                                                                                                                                                                                                                                                                                                                                                                                                                                                                                                                                                                                                                                                                                                                                                                                                                                                                                                                                                                                                                                                                                                                                                                                                                                                                                                                                                                                                                                     | 245     |           |
| 5                       | #3 AND #4<br>("psychologic"[All Fields] OR "psychological"[All Fields] OR "psychologically"[All Fields] OR "psychologization"[All Fields] OR "psychologized"[All Fields] OR "psychologizing"[All Fields] OR ((("psychologic"[All Fields] OR "psychological"[All Fields] OR "psychologically"[All Fields] OR "psychologization"[All Fields] OR "psychologized"[All Fields] OR "psychologizing"[All Fields] AND ("therapeutics"[MeSH Terms] OR "therapeutics"[All Fields] OR "treatments"[All Fields] OR "therapy"[MeSH Subheading] OR "therapy"[All Fields] OR "treatment"[All Fields] OR "treatment s"[All Fields] OR "psychological treatment"[All Fields] OR ((("psychologic"[All Fields] OR "psychological"[All Fields] OR "psychologically"[All Fields] OR "psychologization"[All Fields] OR "psychologized"[All Fields] OR "psychologizing"[All Fields] AND ("intervention s"[All Fields] OR "interventions"[All Fields] OR "interventive"[All Fields] OR "methods"[MeSH Terms] OR "methods"[All Fields] OR "intervention"[All Fields] OR "interventional"[All Fields] OR "psychological intervention") OR "empirically-supported"[All Fields] AND ("psychologic"[All Fields] OR "psychological"[All Fields] OR "psychologically"[All Fields] OR "psychologization"[All Fields] OR "psychologized"[All Fields] OR "psychologizing"[All Fields] AND ("therapeutics"[MeSH Terms] OR "therapeutics"[All Fields] OR "treatments"[All Fields] OR "therapy"[MeSH Subheading] OR "therapy"[All Fields] OR "treatment"[All Fields] OR "treatment s"[All Fields] OR "empirically-supported psychological treatment"[All Fields] OR ("evidence-based"[All Fields] AND ("psychologic"[All Fields] OR "psychological"[All Fields] OR "psychologically"[All Fields] OR "psychologization"[All Fields] OR "psychologized"[All Fields] OR "psychologizing"[All Fields] AND ("therapeutics"[MeSH Terms] OR "therapeutics"[All Fields] OR "treatments"[All Fields] OR "therapy"[MeSH Subheading] OR "therapy"[All Fields] OR "treatment"[All Fields] OR "treatment s"[All Fields] OR "evidence-based psychological treatment") OR ("evidence-based"[All Fields] AND ("behavior therapy"[MeSH Terms] OR ("behavior"[All Fields] AND "therapy"[All Fields]) OR "behavior therapy"[All Fields] OR ("behavioral"[All Fields] AND "treatment"[All Fields]) OR "behavioral treatment"[All Fields]) OR "evidence-based behavioral treatment") OR ("evidence-based"[All Fields] AND ("behavior therapy"[MeSH Terms] OR ("behavior"[All Fields] AND "therapy"[All Fields]) OR "behavior therapy"[All Fields] OR ("behavioural"[All Fields] AND "treatment"[All Fields]) OR "behavioural treatment"[All Fields] OR "evidence-based behavioural treatment"[All Fields] OR ("mental health"[MeSH Terms] OR ("mental"[All Fields] AND "health"[All Fields]) OR "mental health"[All Fields]) OR ("cognitive behavioral therapy"[MeSH Terms] OR ("cognitive"[All Fields] AND "behavioral"[All Fields] AND "therapy"[All Fields]) OR "cognitive behavioral therapy"[All Fields]) OR ("cognitive behavioral therapy"[MeSH Terms] OR ("cognitive"[All Fields] AND "behavioral"[All Fields] AND "therapy"[All Fields]) OR "cognitive behavioural therapy"[All Fields]) OR ("behavior therapy"[MeSH Terms] OR ("behavior"[All Fields] AND "therapy"[All Fields]) OR "behavior therapy"[All Fields] OR ("behavioral"[All Fields] AND "therapy"[All Fields]) OR "behavioral therapy"[All Fields] OR ("behavior therapy"[MeSH Terms] OR ("behavior"[All Fields] AND "therapy"[All Fields]) OR "behavior therapy"[All Fields] OR ("behavioural"[All Fields] AND "therapy"[All Fields]) OR "behavioural therapy"[All Fields] OR ((("interpersonal"[All Fields] OR "interpersonality"[All Fields] OR "interpersonally"[All Fields]) AND ("therapeutics"[MeSH Terms] OR "therapeutics"[All Fields] OR "therapies"[All Fields] OR "therapy"[MeSH Subheading] OR "therapy"[All Fields] OR "therapy s"[All Fields] OR "therapys"[All Fields] OR "interpersonal therapy"[All Fields] OR "interpersonal therapies"[All Fields]) OR ("acceptance and commitment therapy"[MeSH Terms] OR ("acceptance"[All Fields] AND "commitment"[All Fields] AND "therapy"[All Fields]) OR "acceptance and commitment therapy"[All Fields] OR ("psychotherapie"[All Fields] OR "psychotherapy"[MeSH Terms] OR "psychotherapy"[All Fields] OR "psychotherapies"[All Fields] OR "psychotherapy s"[All Fields] OR ("motivational interviewing"[MeSH Terms] OR ("motivational"[All Fields] AND "interviewing"[All Fields]) OR "motivational interviewing"[All Fields]) OR | 926,979 | EBPT      |

|   |                                                                                                                                                                                                                                                                                                                                                                                                                                                                                                                                                                                                                                                                                                                                                                                                                                                                                                                                                                                                                                                                                                                                                                                                                                                                                                                                                                                                                                                                                                                                                                                                                                                                                                                                                                                                                                                                                                                                                                                                                                                                                                                                                                                                                                                                                                                                                                                                                                                                                                                                                                                                                                                                                                                                                                                                                                                                                                                                                                                                                                                                                                                                                                                                                                                                                                                                                                                                                                                                                                                                                                                                                                                                                                                                                                                                                                                                                                                                                                                                                                                                                                                                                                          |         |               |
|---|--------------------------------------------------------------------------------------------------------------------------------------------------------------------------------------------------------------------------------------------------------------------------------------------------------------------------------------------------------------------------------------------------------------------------------------------------------------------------------------------------------------------------------------------------------------------------------------------------------------------------------------------------------------------------------------------------------------------------------------------------------------------------------------------------------------------------------------------------------------------------------------------------------------------------------------------------------------------------------------------------------------------------------------------------------------------------------------------------------------------------------------------------------------------------------------------------------------------------------------------------------------------------------------------------------------------------------------------------------------------------------------------------------------------------------------------------------------------------------------------------------------------------------------------------------------------------------------------------------------------------------------------------------------------------------------------------------------------------------------------------------------------------------------------------------------------------------------------------------------------------------------------------------------------------------------------------------------------------------------------------------------------------------------------------------------------------------------------------------------------------------------------------------------------------------------------------------------------------------------------------------------------------------------------------------------------------------------------------------------------------------------------------------------------------------------------------------------------------------------------------------------------------------------------------------------------------------------------------------------------------------------------------------------------------------------------------------------------------------------------------------------------------------------------------------------------------------------------------------------------------------------------------------------------------------------------------------------------------------------------------------------------------------------------------------------------------------------------------------------------------------------------------------------------------------------------------------------------------------------------------------------------------------------------------------------------------------------------------------------------------------------------------------------------------------------------------------------------------------------------------------------------------------------------------------------------------------------------------------------------------------------------------------------------------------------------------------------------------------------------------------------------------------------------------------------------------------------------------------------------------------------------------------------------------------------------------------------------------------------------------------------------------------------------------------------------------------------------------------------------------------------------------------------------------|---------|---------------|
|   | (("interpersonal"[All Fields] OR "interpersonality"[All Fields] OR "interpersonally"[All Fields]) AND ("therapeutics"[MeSH Terms] OR "therapeutics"[All Fields] OR "therapies"[All Fields] OR "therapy"[MeSH Subheading] OR "therapy"[All Fields] OR "therapy s"[All Fields] OR "therapys"[All Fields]))                                                                                                                                                                                                                                                                                                                                                                                                                                                                                                                                                                                                                                                                                                                                                                                                                                                                                                                                                                                                                                                                                                                                                                                                                                                                                                                                                                                                                                                                                                                                                                                                                                                                                                                                                                                                                                                                                                                                                                                                                                                                                                                                                                                                                                                                                                                                                                                                                                                                                                                                                                                                                                                                                                                                                                                                                                                                                                                                                                                                                                                                                                                                                                                                                                                                                                                                                                                                                                                                                                                                                                                                                                                                                                                                                                                                                                                                 |         |               |
| 3 | #1 AND #2                                                                                                                                                                                                                                                                                                                                                                                                                                                                                                                                                                                                                                                                                                                                                                                                                                                                                                                                                                                                                                                                                                                                                                                                                                                                                                                                                                                                                                                                                                                                                                                                                                                                                                                                                                                                                                                                                                                                                                                                                                                                                                                                                                                                                                                                                                                                                                                                                                                                                                                                                                                                                                                                                                                                                                                                                                                                                                                                                                                                                                                                                                                                                                                                                                                                                                                                                                                                                                                                                                                                                                                                                                                                                                                                                                                                                                                                                                                                                                                                                                                                                                                                                                | 1,019   |               |
| 2 | "task sharing"[All Fields] OR "task shifting"[All Fields] OR "care sharing"[All Fields]                                                                                                                                                                                                                                                                                                                                                                                                                                                                                                                                                                                                                                                                                                                                                                                                                                                                                                                                                                                                                                                                                                                                                                                                                                                                                                                                                                                                                                                                                                                                                                                                                                                                                                                                                                                                                                                                                                                                                                                                                                                                                                                                                                                                                                                                                                                                                                                                                                                                                                                                                                                                                                                                                                                                                                                                                                                                                                                                                                                                                                                                                                                                                                                                                                                                                                                                                                                                                                                                                                                                                                                                                                                                                                                                                                                                                                                                                                                                                                                                                                                                                  | 1,491   | Task-shifting |
| 1 | (("community health workers"[MeSH Terms] OR ("community"[All Fields] AND "health"[All Fields] AND "workers"[All Fields]) OR "community health workers"[All Fields] OR ("community"[All Fields] AND "health"[All Fields] AND "worker"[All Fields]) or "community health worker"[All Fields])) OR ((("church"[All Fields] OR "church s"[All Fields] OR "churches"[All Fields])) OR (((("community"[All Fields] AND ("facilitate"[All Fields] OR "facilitated"[All Fields] OR "facilitates"[All Fields] OR "facilitating"[All Fields] OR "facilitation"[All Fields] OR "facilitations"[All Fields] OR "facilitative"[All Fields] OR "facilitator"[All Fields] OR "facilitator s"[All Fields] OR "facilitators"[All Fields])) OR "community based facilitator"[All Fields]) OR ((("community"[All Fields] AND ("organisation"[All Fields] OR "organization and administration"[MeSH Subheading] OR ("organization"[All Fields])) OR "community based organization" [All Fields]) OR ("health workforce"[MeSH Terms] OR ("health"[All Fields] AND "workforce"[All Fields]) OR "health workforce"[All Fields] OR ("health"[All Fields] AND "manpower"[All Fields]) OR "health manpower"[All Fields]) OR ("lay"[All Fields] AND ("counsellor"[All Fields] OR "counselors"[MeSH Terms] OR "counselors"[All Fields] OR "counselor"[All Fields] OR "counseling"[MeSH Terms] OR "counseling"[All Fields] OR "counsellor s"[All Fields] OR "counsellors"[All Fields] OR "counselor s"[All Fields])) OR "lay counselor" [All Fields] OR "lay counsellor"[All Fields]) OR ("lay"[All Fields] AND ("health"[MeSH Terms] OR "health"[All Fields] OR "health s"[All Fields]) AND ("occupational groups"[MeSH Terms] OR ("occupational"[All Fields] AND "groups"[All Fields]) OR "occupational groups"[All Fields] OR "worker"[All Fields] OR "workers"[All Fields] OR "worker s"[All Fields]) OR "lay health worker" [All Fields]) OR ("non"[All Fields] AND ("licence"[All Fields] OR "licencing"[All Fields] OR "licensed"[All Fields] OR "licenses"[All Fields] OR "licensing"[All Fields]) OR "non-licensed"[All Fields] OR "nonlicensed" [All Fields] OR "non-licensed" [All Fields] OR "nonlicensed" [All Fields]) OR ("nonprofessional"[All Fields] OR "nonprofessionals"[All Fields]) OR ("non-specialist" [All Fields] OR "non-specialists" [All Fields] OR "nonspecialist" [All Fields] OR "nonspecialists" [All Fields]) OR ("patient care team"[MeSH Terms] OR ("patient"[All Fields] AND "care"[All Fields] AND "team"[All Fields]) OR "patient care team"[All Fields] OR ("patient"[All Fields] AND "care"[All Fields] AND "teams"[All Fields]) OR "patient care teams"[All Fields]) OR ("patient navigation"[MeSH Terms] OR ("patient"[All Fields] AND "navigation"[All Fields]) OR "patient navigation"[All Fields] OR ("patient"[All Fields] AND "navigator"[All Fields]) OR "patient navigator"[All Fields]) OR ("peer" [all fields] OR ("peer-coach" [all fields]) OR ("peer-counselor"[All Fields]) OR ("peer-counsellor"[All Fields]) OR ("peer-facilitator"[All Fields]) OR ("promotor"[All Fields] OR "promotors"[All Fields]) OR ("promotora"[All Fields] OR "promotoras"[All Fields]) OR ("promotores"[All Fields]) OR ("self care"[MeSH Terms] OR ("self"[All Fields] AND "care"[All Fields]) OR "self care"[All Fields]) OR ("self management"[MeSH Terms] OR "self management"[All Fields] OR ("self"[All Fields] AND "management"[All Fields]) OR "self management"[All Fields]) OR ((("share"[All Fields] OR "shared"[All Fields] OR "shares"[All Fields] OR "sharing"[All Fields] OR "sharings"[All Fields]) AND "care"[All Fields] OR "shared care" [All Fields]) OR ((("tradition"[All Fields] OR "tradition s"[All Fields] OR "traditional"[All Fields] OR "traditionals"[All Fields] OR "traditions"[All Fields]) AND ("healer"[All Fields] OR "healer s"[All Fields] OR "healers"[All Fields]) OR "traditional healer"[All Fields]) OR ("unlicensed"[All Fields] OR ("nonphysician"[All Fields] OR "nonphysicians"[All Fields]) OR ((("physician"[All Fields] AND "extender"[All Fields]) OR "physician extender"[All Fields]) OR ("CHW"[all fields]) | 767,391 | Lay worker    |
