# Supplementary material
Source: HighWire-hosted journal article supplement (https://bmjopen.bmj.com/content/11/2/e044012)
Supplement: inline-supplementary-material-2 [file inline-supplementary-material-2.pdf]

## Supplemental Material: Example Study Extraction

| Study 1<br>Smith & Garza<br>(2020).    | <b>Design:</b> RCT<br><b>Setting:</b> Primary care clinic/academic medical center<br><b>Participant demographics:</b> Adults age 18-65, 60% women, 45% Hispanic/Latinx; 25% White non-Hispanic/Latinx, 6% Black, 4% other<br><b>Geographic location:</b> Southwestern US<br><b>Effect sizes:</b> Between group differences: $d=0.065$ (medium),<br>Within-group difference (Active tx): $d=0.06$ (medium) |                                                                                                                                                                                                                                                                                                                         | <b>ACTORS</b>                                                                           | <b>ACTION TARGET</b>                                    | <b>IMPLEMENTATION OUTCOME AFFECTED</b>          | <b>JUSTIFICATION</b>                                                                                               |
|----------------------------------------|-----------------------------------------------------------------------------------------------------------------------------------------------------------------------------------------------------------------------------------------------------------------------------------------------------------------------------------------------------------------------------------------------------------|-------------------------------------------------------------------------------------------------------------------------------------------------------------------------------------------------------------------------------------------------------------------------------------------------------------------------|-----------------------------------------------------------------------------------------|---------------------------------------------------------|-------------------------------------------------|--------------------------------------------------------------------------------------------------------------------|
| <b>ACTIONS, TEMPORALITY &amp; DOSE</b> | <b>Adaptations</b>                                                                                                                                                                                                                                                                                                                                                                                        | <b>Description:</b> Modified protocol from 6-week hour-long CBT for depression sessions in clinic to 6 modules of CBT basics delivered in homes by CHWs<br><br>1. Three one-hour focus groups<br>2. Modifications to CBT for depression protocol based on focus group feedback<br>3. Revisions of handouts and protocol | <i>Focus groups:</i> CHWs<br><br><i>Modifications &amp; materials:</i><br>Research team | CBT for depression protocol and handouts                | -Acceptability<br>-Adoption<br>-Appropriateness | <i>Focus groups:</i><br>Empirical & pragmatic<br><br><i>Modifications &amp; materials:</i> pragmatic justification |
|                                        | <b>Training</b>                                                                                                                                                                                                                                                                                                                                                                                           | 4. Training developed post-focus group<br>5. Two half-day workshop trainings<br>6. Pre-post knowledge tests                                                                                                                                                                                                             | Licensed Psychologists taught CHWs                                                      | Knowledge & skills of CHWs                              | -Feasibility                                    | Pragmatic                                                                                                          |
|                                        | <b>Implementation steps</b>                                                                                                                                                                                                                                                                                                                                                                               | 7. Established competency benchmarks<br>8. Implementation of program<br>9. Random selection of recordings (20%) for fidelity to competency benchmarks<br>10. Feedback with weekly supervision                                                                                                                           | Licensed psychologists listened to recordings/provided supervision to CHWs              | Primary care patients<br><br>CHWs                       | -Fidelity<br>-Uptake                            | Theoretical & empirical                                                                                            |
|                                        | <b>Sustainment</b>                                                                                                                                                                                                                                                                                                                                                                                        | 11. System hired supervising psychologist to provide weekly group supervision<br>12. Funding to sustain provided by clinic department                                                                                                                                                                                   | Administrators supported infrastructure change                                          | Program - CBT for depression delivered in homes by CHWs | -Sustainability & maintenance                   | Pragmatic                                                                                                          |
